# Supplementary material for: NFκB-Activated COX2/PGE2/EP4 Axis Controls the Magnitude and Selectivity of BCG-Induced Inflammation in Human Bladder Cancer Tissues
Source: MDPI journal article supplement (doi:10.3390/cancers13061323), 2021-03-16
Supplement: s1 [file s1]

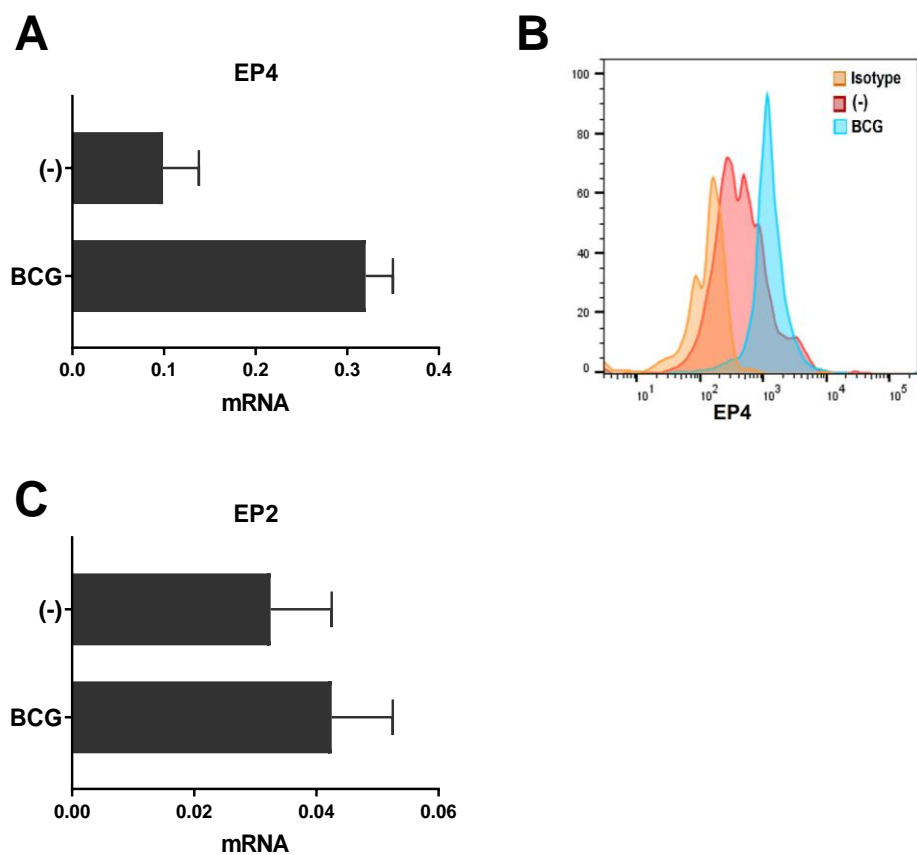

**Supplemental Figure 1. BCG treatment elevates EP4 expression.** **A**, BCG enhanced EP4 receptor gene expression in tumor tissue explants. **B**, EP4 receptor protein surface expression by cultured human macrophages measured by flow cytometry. Data from a representative donor. **C**, No changes in EP2 receptor gene expression in tumor tissue explants after BCG administration. Tumor tissue explants are from 4 different independent patients ( $n=4$ ). The results are shown as mean  $\pm$  SEM.
